# Supplementary material for: Evaluation of NAB2-STAT6 Fusion Variants and Other Molecular Alterations as Prognostic Biomarkers in a Case Series of 83 Solitary Fibrous Tumors
Source: MDPI journal article supplement (doi:10.3390/cancers13205237), 2021-10-19
Supplement: s1 [file s1]

**Table S1.** Summary of clinicopathological and molecular data from all 83 solitary fibrous tumor (SFT) cases

| #  | Cohort | Specimen type | Age (years) | Gender | Location | Size (mm) | Mitotic counts | Necrosis | STAT6 IHC | P53 IHC | BCOR IHC | Pan-TRK IHC | pTERT status | NAB2-STAT6 fusion variant | NAB2-STAT6 group | Relapse or progression | DFS  | Exitus | OS    | mDemicco risk / CNS-G grade |
|----|--------|---------------|-------------|--------|----------|-----------|----------------|----------|-----------|---------|----------|-------------|--------------|---------------------------|------------------|------------------------|------|--------|-------|-----------------------------|
| 1  | L      | P             | 38          | F      | PP       | 70        | NA             | NA       | +         | 1.5     | 6        | 0           | NA           | 7-1int                    | FULL             | No                     | 1.3  | No     | 1.3   | NA                          |
| 2  | L      | P             | 45          | F      | pp       | 140       | 1              | yes      | +         | 0       | 2        | 1.5 (N)     | NA           | 6-17                      | TAD              | Yes                    | 2.5  | No     | 2.5   | Int                         |
| 3  | L      | P             | 65          | F      | PP       | 100       | 0              | yes      | NA        | 0       | 1        | 0           | C228T        | 4-2                       | FULL             | No                     | 4.4  | No     | 4.4   | Int                         |
| 4  | L      | P             | 52          | M      | PP       | 200       | 15             | yes      | +         | 9       | 4        | 0           | NA           | 4-2                       | FULL             | Yes                    | 4.9  | No     | 13.3  | High                        |
| 5  | L      | P             | 56          | F      | Ext      | 45.5      | 0              | No       | +         | NA      | NA       | NA          | NA           | 2-2                       | FULL             | No                     | 6.0  | No     | 6.0   | Low                         |
| 6  | L      | P             | 52          | M      | Vis      | 15        | 1              | NA       | +         | 3.5     | 6        | 0           | wt           | 6-17                      | TAD              | No                     | 6.3  | No     | 6.3   | NA                          |
| 7  | L      | P             | 32          | F      | PP       | 75        | NA             | NA       | +         | 3       | 0        | 0           | NA           | 4-2                       | FULL             | No                     | 8.0  | No     | 8.0   | NA                          |
| 8  | L      | P             | 40          | M      | H&N      | 100       | 0              | No       | NA        | 1       | 9        | 0           | NA           | 5-16                      | TAD              | No                     | 8.6  | No     | 8.6   | Low                         |
| 9  | L      | P             | 41          | F      | Abd      | 70        | 0              | No       | +         | 4       | 6        | 2 (C)       | NA           | 5-17                      | TAD              | No                     | 9.5  | No     | 9.5   | Low                         |
| 10 | L      | P             | 60          | M      | Trunk    | NA        | 0              | No       | +         | NA      | NA       | NA          | NA           | 7-1int                    | FULL             | No                     | 9.7  | No     | 9.7   | NA                          |
| 11 | L      | P             | 77          | F      | Ext      | NA        | NA             | NA       | NA        | NA      | NA       | NA          | NA           | 4-2                       | FULL             | No                     | 11.5 | No     | 11.5  | NA                          |
| 12 | L      | P             | 55          | M      | H&N      | 35        | 1              | No       | +         | NA      | NA       | NA          | NA           | 4-4                       | FULL             | No                     | 12.6 | No     | 12.6  | Low                         |
| 13 | L      | R             | 60          | M      | Vis      | NA        | 6              | NA       | +         | NA      | NA       | NA          | NA           | 6-17                      | TAD              | Yes                    | 16.3 | No     | 28.4  | NA                          |
| 14 | L      | P             | 43          | M      | Vis      | 95        | 0              | No       | +         | NA      | NA       | NA          | NA           | 4-2                       | FULL             | No                     | 16.9 | No     | 16.9  | Low                         |
| 15 | L      | P             | 49          | M      | pp       | 98        | 3              | No       | +         | 5       | 3.5      | 0           | NA           | 4-2                       | FULL             | No                     | 17.0 | No     | 17.0  | Low                         |
| 16 | L      | P*            | 62          | F      | Abd      | NA        | NA             | NA       | +         | NA      | NA       | NA          | NA           | 3-19                      | TAD              | Yes                    | 23.0 | No     | 38.0  | NA                          |
| 17 | L      | P             | 68          | M      | PP       | 37        | 1              | No       | +         | NA      | NA       | NA          | NA           | 4-2                       | FULL             | No                     | 23.0 | No     | 23.0  | Low                         |
| 18 | L      | P             | 27          | M      | Vis      | 120       | 7              | No       | NA        | NA      | NA       | NA          | wt           | 6-17                      | TAD              | No                     | 24.4 | No     | 24.4  | Int                         |
| 19 | L      | P             | 56          | F      | Abd      | 210       | 3              | Yes      | +         | 1       | 5        | 2.5 (N)     | NA           | 5-16                      | TAD              | No                     | 25.4 | No     | 25.4  | High                        |
| 20 | L      | P*            | 49          | F      | Vis      | 130       | 17             | NA       | +         | 5       | 6        | 0           | wt           | 6-16                      | TAD              | No                     | 26.8 | No     | 26.8  | NA                          |
| 21 | L      | R             | 68          | F      | Abd      | NA        | 2              | NA       | +         | NA      | NA       | NA          | NA           | 6-17                      | TAD              | Yes                    | 30.0 | No     | 90.9  | NA                          |
| 22 | L      | P             | 62          | F      | Ext      | 95        | 0              | No       | +         | NA      | NA       | NA          | NA           | 5-16                      | TAD              | No                     | 32.9 | No     | 32.9  | Low                         |
| 23 | L      | P             | 48          | F      | Vis      | 63        | 4              | No       | +         | 0.5     | 1.5      | 2.5 (N)     | NA           | 6-16                      | TAD              | No                     | 33.5 | No     | 33.5  | Low                         |
| 24 | L      | P             | 71          | F      | Ext      | 50        | 0              | No       | +         | NA      | NA       | NA          | NA           | 2-5                       | FULL             | No                     | 47.4 | No     | 47.4  | Low                         |
| 25 | L      | R             | 42          | F      | Men      | NA        | 9              | No       | NA        | 3       | 9        | 1.5 (N)     | NA           | 6-16                      | TAD              | Yes                    | 66.8 | Yes    | 131.9 | CNS-G III                   |
| 26 | L      | P             | 79          | F      | Trunk    | 40        | 1              | No       | NA        | NA      | NA       | NA          | NA           | 3-19                      | TAD              | No                     | 73.0 | No     | 73.0  | Low                         |
| 27 | L      | P             | 69          | F      | PP       | 120       | 3              | No       | NA        | 1       | 1        | 0.5 (N)     | NA           | 4-2                       | FULL             | No                     | 74.1 | No     | 74.1  | Int                         |
| 28 | L      | R             | NA          | NA     | NA       | NA        | 0              | No       | +         | NA      | NA       | NA          | NA           | 6-16                      | TAD              | NA                     | NA   | NA     | NA    | NA                          |
| 29 | L      | R             | NA          | F      | NA       | NA        | 12             | No       | NA        | NA      | NA       | NA          | C228A        | 4-2                       | FULL             | NA                     | NA   | NA     | NA    | NA                          |
| 30 | L      | P*            | 74          | M      | Vis      | NA        | 14             | yes      | +         | NA      | NA       | NA          | C228T        | 4-2                       | FULL             | NA                     | NA   | NA     | NA    | NA                          |
| 31 | L      | P             | 63          | M      | Abd      | NA        | 5              | No       | +         | NA      | NA       | NA          | wt           | 6-16                      | TAD              | NA                     | NA   | NA     | NA    | NA                          |

|    |   |    |    |    |       |     |    |     |   |     |     |         |        |        |      |     |      |     |       |           |
|----|---|----|----|----|-------|-----|----|-----|---|-----|-----|---------|--------|--------|------|-----|------|-----|-------|-----------|
| 32 | L | P  | NA | NA | Abd   | NA  | 3  | No  | + | NA  | NA  | NA      | NA     | 6-15   | TAD  | NA  | NA   | NA  | NA    | NA        |
| 33 | L | P  | 70 | M  | Men   | NA  | 3  | No  | + | NA  | NA  | NA      | wt     | 6-16   | TAD  | NA  | NA   | NA  | NA    | CNS-G III |
| 34 | G | R  | 64 | M  | PP    | 165 | 0  | No  | + | NA  | NA  | NA      | C228T  | 4-2    | FULL | Yes | 4.2  | Yes | 25.5  | Int       |
| 35 | G | P  | 48 | F  | H&N   | 30  | 0  | No  | + | 3   | 9   | 0.5 (N) | NA     | 6-5    | FULL | Yes | 4.2  | No  | 8.8   | Low       |
| 36 | G | R  | 58 | M  | H&N   | 27  | 2  | No  | + | 1   | 7.5 | 2 (N/C) | NA     | 6-16   | TAD  | Yes | 4.5  | No  | 148.9 | Low       |
| 37 | G | R  | 87 | F  | PP    | 125 | 4  | Yes | + | 1   | 2   | 3 (N)   | C228T  | 4-2    | FULL | Yes | 4.9  | Yes | 11.6  | High      |
| 38 | G | P* | 51 | F  | Ext   | 95  | 32 | No  | + | 9   | 1.5 | 0.5 (N) | C228T# | 6-16   | TAD  | Yes | 5.3  | Yes | 11.5  | Low       |
| 39 | G | R  | 64 | M  | PP    | NA  | 3  | No  | + | NA  | NA  | NA      | C228T  | 4-2    | FULL | Yes | 5.3  | Yes | 13.5  | NA        |
| 40 | G | R  | 32 | M  | Abd   | NA  | 3  | No  | + | 0   | 4.5 | 1.5 (N) | NA     | 6-16   | TAD  | Yes | 6.0  | Yes | 92.8  | NA        |
| 41 | G | R  | 76 | F  | Ext   | 57  | 0  | No  | + | NA  | NA  | NA      | NA     | 2-2    | FULL | Yes | 7.8  | No  | 14.8  | Low       |
| 42 | G | P  | 55 | M  | Ext   | 90  | 0  | No  | + | NA  | 9   | NA      | NA     | 6-16   | TAD  | Yes | 8.4  | Yes | 14.1  | Low       |
| 43 | G | R  | 53 | F  | Trunk | 80  | 0  | No  | + | NA  | NA  | NA      | NA     | 6-16   | TAD  | Yes | 10.2 | No  | 28.9  | Low       |
| 44 | G | R  | 76 | M  | Vis   | 130 | 0  | No  | + | NA  | NA  | NA      | NA     | 7-4    | FULL | Yes | 10.4 | Yes | 28.6  | Low       |
| 45 | G | R  | 79 | F  | Ext   | 85  | 3  | Yes | + | 3   | 6   | 1 (N)   | NA     | 6-16   | TAD  | Yes | 10.7 | No  | 36.5  | Int       |
| 46 | G | P  | 76 | M  | pp    | 210 | 0  | No  | + | NA  | NA  | NA      | NA     | 4-2    | FULL | Yes | 11.1 | Yes | 11.1  | Int       |
| 47 | G | R  | 35 | M  | H&N   | NA  | 8  | No  | + | 0   | 6   | 0       | NA     | 6-16   | TAD  | Yes | 12.2 | No  | 183.9 | NA        |
| 48 | G | R  | 43 | F  | Vis   | NA  | 7  | No  | + | 7.5 | 1.5 | 2 (N)   | wt     | 4-2    | FULL | Yes | 13.7 | No  | 17.6  | NA        |
| 49 | G | R  | 72 | M  | Trunk | 40  | 13 | No  | + | 9   | 9   | 1 (N)   | NA     | 5-16   | TAD  | Yes | 18.0 | Yes | 24.1  | Low       |
| 50 | G | R  | 69 | M  | Men   | NA  | 5  | No  | + | 2.5 | 5   | 3 (N)   | C228T  | 4-2    | FULL | Yes | 20.8 | No  | 20.8  | CNS-G III |
| 51 | G | R  | 74 | M  | Ext   | NA  | 6  | No  | + | 3   | 9   | 1 (N/C) | NA     | 2-2    | FULL | Yes | 25.3 | No  | 36.2  | NA        |
| 52 | G | R  | 54 | F  | PP    | 15  | 0  | No  | + | NA  | NA  | NA      | NA     | 6-16   | TAD  | Yes | 30.6 | No  | 114.7 | Low       |
| 53 | G | R  | 50 | M  | H&N   | 60  | 0  | No  | + | NA  | NA  | NA      | NA     | 6-16   | TAD  | Yes | 32.5 | No  | 48.5  | Low       |
| 54 | G | R  | 74 | M  | PP    | NA  | 4  | No  | + | 3   | 1   | 1 (N)   | NA     | 4-2    | FULL | Yes | 33.4 | No  | 57.1  | NA        |
| 55 | G | R  | 47 | F  | Abd   | 75  | 9  | No  | + | NA  | NA  | NA      | wt     | 6-16   | TAD  | Yes | 33.8 | No  | 48.6  | Low       |
| 56 | G | R  | 74 | F  | Ext   | 90  | 6  | Yes | + | 2.5 | 3   | 2.5 (N) | NA     | 6int-2 | FULL | Yes | 37.6 | No  | 64.9  | Int       |
| 57 | G | R  | 78 | F  | PP    | 100 | 8  | No  | + | 2   | 0   | 0       | NA     | 4-2    | FULL | Yes | 38.8 | No  | 85.7  | Int       |
| 58 | G | R  | 52 | F  | PP    | NA  | 8  | No  | + | 1.5 | 3   | 1.5 (N) | NA     | 6-16   | TAD  | Yes | 46.7 | No  | 112.6 | NA        |
| 59 | G | R  | 50 | F  | Vis   | 130 | 0  | No  | + | NA  | NA  | NA      | NA     | 6-2    | FULL | Yes | 51.2 | No  | 76.3  | Low       |
| 60 | G | R  | 31 | F  | H&N   | 37  | 0  | No  | + | 0   | 1.5 | 0       | C228T  | 4-2    | FULL | Yes | 56.0 | No  | 102.7 | Low       |
| 61 | G | R  | 34 | M  | Abd   | 190 | 4  | No  | + | 1   | 1   | 0.5 (N) | NA     | 6-16   | TAD  | Yes | 56.9 | No  | 92.2  | Int       |
| 62 | G | R  | 66 | M  | PP    | 140 | 11 | Yes | + | 1   | 1   | 2 (N)   | NA     | 4-2    | FULL | Yes | 57.8 | Yes | 106.0 | High      |
| 63 | G | R  | 50 | F  | Abd   | 30  | 14 | No  | + | 7.5 | 3   | 1.5 (N) | NA     | 2-5    | FULL | Yes | 57.8 | No  | 179.7 | Low       |
| 64 | G | R  | 20 | M  | Men   | NA  | 7  | Yes | + | 2.5 | 4.5 | 0       | wt     | 6-16   | TAD  | Yes | 61.4 | No  | 193.2 | CNS-G III |
| 65 | G | R  | 49 | M  | H&N   | 85  | 3  | No  | + | NA  | NA  | NA      | NA     | 2-1int | FULL | Yes | 64.4 | No  | 75.5  | Low       |
| 66 | G | R  | 66 | F  | Abd   | NA  | 0  | No  | + | NA  | NA  | NA      | NA     | 4-2    | FULL | Yes | 69.4 | Yes | 81.0  | NA        |
| 67 | G | R  | 52 | M  | Men   | NA  | 3  | No  | + | 1   | 9   | 1 (C)   | NA     | 6-16   | TAD  | Yes | 70.4 | Yes | 111.9 | CNS-G II  |

|    |   |   |    |   |       |     |    |     |   |     |     |         |    |         |      |     |       |     |       |           |
|----|---|---|----|---|-------|-----|----|-----|---|-----|-----|---------|----|---------|------|-----|-------|-----|-------|-----------|
| 68 | G | R | 37 | F | Abd   | 100 | 0  | No  | + | NA  | NA  | NA      | NA | 2-1int  | FULL | Yes | 74.5  | No  | 95.3  | Low       |
| 69 | G | R | 61 | F | PP    | 70  | 1  | No  | + | NA  | NA  | NA      | NA | 6-16    | TAD  | Yes | 75.3  | Yes | 91.9  | Low       |
| 70 | G | R | 42 | F | Men   | 50  | 12 | No  | + | 6   | 9   | 0.5 (N) | NA | 6-16    | TAD  | Yes | 75.8  | Yes | 80.8  | CNS-G III |
| 71 | G | R | 60 | M | Men   | NA  | 0  | No  | + | NA  | NA  | NA      | NA | 6-16    | TAD  | Yes | 76.0  | No  | 85.3  | NA        |
| 72 | G | R | 27 | F | Men   | NA  | 6  | No  | + | 4   | 9   | 1 (N/C) | NA | 6-16    | TAD  | Yes | 91.9  | No  | 166.9 | CNS-G III |
| 73 | G | R | 33 | F | Men   | 39  | 3  | No  | + | 1.5 | 6   | 1 (N)   | NA | 6-16    | TAD  | Yes | 92.5  | No  | 138.0 | CNS-G II  |
| 74 | G | R | 22 | F | Men   | NA  | 9  | No  | + | NA  | NA  | NA      | NA | 6-16    | TAD  | Yes | 96.5  | No  | 127.0 | CNS-G III |
| 75 | G | R | 40 | F | Trunk | 60  | 1  | Yes | + | 0   | 6   | 0       | NA | 5int-16 | TAD  | Yes | 101.3 | No  | 117.4 | Low       |
| 76 | G | R | 56 | F | PP    | 90  | 1  | No  | + | NA  | NA  | NA      | NA | 4-2     | FULL | Yes | 133.5 | No  | 238.7 | Low       |
| 77 | G | R | 52 | F | PP    | 155 | 10 | Yes | + | 0.5 | 1   | 2.5 (N) | NA | 4-2     | FULL | Yes | 138.5 | No  | 139.2 | High      |
| 78 | G | R | 28 | F | Men   | NA  | 1  | No  | + | 0   | 5   | 0.5 (N) | NA | 6-17    | TAD  | Yes | 150.0 | No  | 274.9 | CNS-G I   |
| 79 | G | R | 67 | M | Trunk | 270 | 8  | No  | + | 2.5 | 4.5 | 1 (N)   | wt | 4-2     | FULL | Yes | 157.8 | No  | 191.5 | High      |
| 80 | G | R | 59 | F | Abd   | 75  | 6  | Yes | + | 1.5 | 4   | 2 (C)   | NA | 4-2     | FULL | Yes | 179.2 | Yes | 210.9 | Int       |
| 81 | G | R | 59 | M | H&N   | 40  | 3  | No  | + | NA  | NA  | NA      | NA | 6-17    | TAD  | Yes | 197.2 | No  | 233.8 | Low       |
| 82 | G | R | 52 | F | Abd   | 200 | 2  | No  | + | 0.5 | 2.5 | 1.5 (N) | NA | 6-17    | TAD  | Yes | 229.4 | Yes | 325.8 | Int       |
| 83 | G | R | 73 | M | PP    | NA  | 48 | NA  | + | NA  | NA  | NA      | NA | 2-2     | FULL | NA  | NA    | NA  | NA    | NA        |

Abbreviations: Cohort: (L) Local; (G) GEIS; Specimen type: (P) Primary; (R) Recidive; Gender: (M) Male; (F) Female; Location: (PP) Pleuro-pulmonary; (Ext) Extremity; (Abd) Abdominal; (H&N) Head and Neck; (Vis); Visceral; (Men) Meningeal; pan-TRK IHC: (N) Nuclear staining; (C) Cytoplasmic staining; *TERT* promoter (*pTERT*) status: (wt) wild-type; (C228T or C228A) mutated at C228; (DFS) disease-free survival; (OS) overall survival, both expressed in months. Non-meningeal SFTs are stratified by mDemicco risk stratification system as Low, Intermediate (Int) or High; and meningeal SFTs are stratified by WHO Classification - CNS Tumours as I, II or III. (NA) Not available data. \*Dedifferentiated SFTs. #*pTERT* homozygous mutation.
