# Supplementary material for: Evaluation of NAB2-STAT6 Fusion Variants and Other Molecular Alterations as Prognostic Biomarkers in a Case Series of 83 Solitary Fibrous Tumors
Source: MDPI journal article supplement (doi:10.3390/cancers13205237), 2021-10-19
Supplement: s1 [file s1]

**Table S2.** Antibodies, suppliers, dilutions and scoring

| Marker | Antibody                                                                      | Supplier                 | Dilution    | Cut-off                        |
|--------|-------------------------------------------------------------------------------|--------------------------|-------------|--------------------------------|
| P53    | CONFIRM anti-p53 (DO-7), mouse monoclonal antibody (IgG <sub>1</sub> , kappa) | Roche                    | pre-diluted | Low: 0-1.5<br>High: 2-9        |
| NTRK   | Anti-Pan Trk (ab181560), rabbit monoclonal                                    | Abcam                    | 1/250       | Negative: 0<br>Positive: 0.5-9 |
| BCOR   | Anti-BCOR (C-10 )                                                             | Santa Cruz Biotechnology | 1/70        | Low: 0-5<br>High: 5.5-9        |
