# Supplementary material for: Evaluation of NAB2-STAT6 Fusion Variants and Other Molecular Alterations as Prognostic Biomarkers in a Case Series of 83 Solitary Fibrous Tumors
Source: MDPI journal article supplement (doi:10.3390/cancers13205237), 2021-10-19
Supplement: s1 [file s1]

|                               | Low       | Intermediate | High     | p value       |
|-------------------------------|-----------|--------------|----------|---------------|
| <b>GEIS cohort, n=37</b>      | n=20      | n=8          | n=9      |               |
| <b>Recurrence/progression</b> |           |              |          |               |
| No (%)                        | 0 (0)     | 0 (0)        | 0 (0)    |               |
| Yes (%)                       | 20 (54.1) | 8 (21.6)     | 9 (24.3) |               |
| <b>Outcome</b>                |           |              |          |               |
| Alive (%)                     | 15 (60)   | 4 (16)       | 6 (24)   | 0.4417        |
| Died of disease (%)           | 5 (41.7)  | 4 (33.3)     | 3 (25)   |               |
| <b>Local cohort, n=18</b>     | n=11      | n=5          | n=2      |               |
| <b>Recurrence/progression</b> |           |              |          | <b>0.0022</b> |
| No (%)                        | 11 (73.3) | 4 (26.7)     | 0 (0)    |               |
| Yes (%)                       | 0 (0)     | 1 (33.3)     | 2 (66.7) |               |
| <b>Outcome</b>                |           |              |          | <b>0.0145</b> |
| Alive (%)                     | 11 (64.7) | 5 (29.4)     | 1 (5.9)  |               |
| Died of disease (%)           | 0 (0)     | 0 (0)        | 1 (100)  |               |

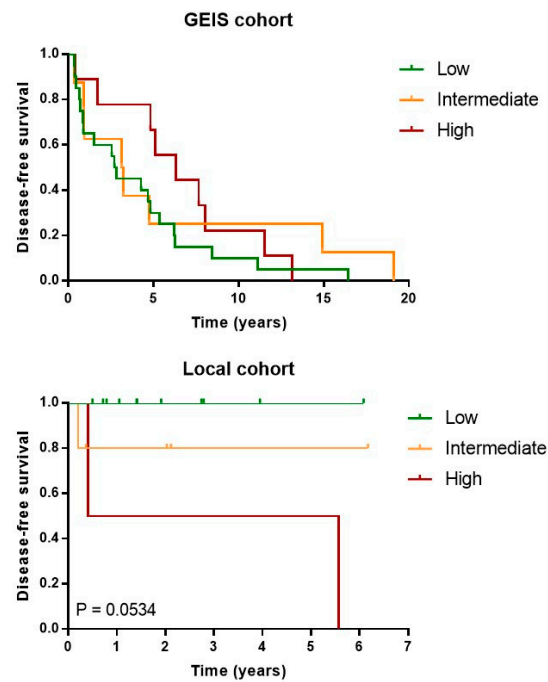

**Figure S1.** Patient risk stratification in GEIS and local cohorts attending to the *mDemicco* system. Patients with age, tumor size, mitotic count and necrosis available data were classified into three risk groups (low, intermediate and high) according to *mDemicco* risk stratification model. Kaplan-Meier survival curves of disease-free survival of GEIS (top) and local (bottom) cohorts, stratified based on risk groups.
