# Supplementary material for: Evaluation of NAB2-STAT6 Fusion Variants and Other Molecular Alterations as Prognostic Biomarkers in a Case Series of 83 Solitary Fibrous Tumors
Source: MDPI journal article supplement (doi:10.3390/cancers13205237), 2021-10-19
Supplement: s1 [file s1]

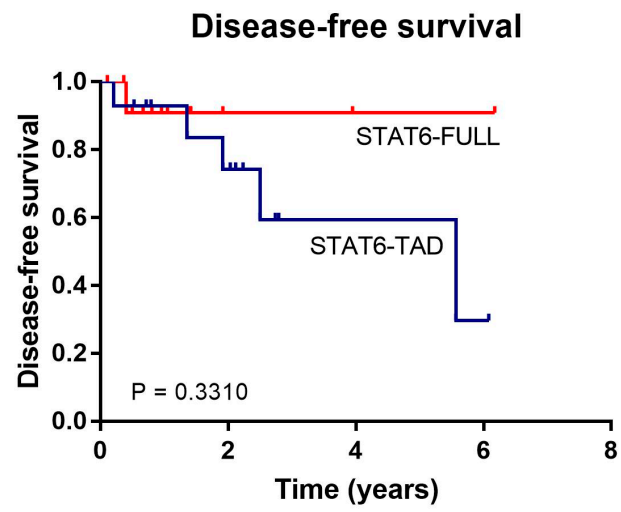

**Figure S2.** Kaplan-Meier estimates for fusion variants in the local cohort. Kaplan-Meier survival curves of disease-free survival of local cohorts, stratified based on fusion variants.
