# Supplementary material for: Evaluation of NAB2-STAT6 Fusion Variants and Other Molecular Alterations as Prognostic Biomarkers in a Case Series of 83 Solitary Fibrous Tumors
Source: MDPI journal article supplement (doi:10.3390/cancers13205237), 2021-10-19
Supplement: s1 [file s1]

**Table S3.** Associations of NAB2-STAT6 fusion variants with clinicopathological parameters

|                                | Whole series |              |             |                | GEIS cohort |              |             |                | Local cohort |              |             |                |
|--------------------------------|--------------|--------------|-------------|----------------|-------------|--------------|-------------|----------------|--------------|--------------|-------------|----------------|
| NAB2-STAT6 fusion variant      | 6-16/17      | 4-2          | other       | <i>p</i> value | 6-16/17     | 4-2          | other       | <i>p</i> value | 6-16/17      | 4-2          | other       | <i>p</i> value |
| <b>Relative frequency</b>      |              |              |             |                |             |              |             |                |              |              |             |                |
| No. (%)                        | 34 (41)      | 25 (30.1)    | 24 (28.9)   |                | 23 (46)     | 15 (30)      | 12 (24)     |                | 11 (33.3)    | 10 (30.3)    | 12 (36.4)   |                |
| <b>Sex</b>                     | 0.617        |              |             |                | 0.964       |              |             |                | 0.471        |              |             |                |
| Male                           | 15 (42.9)    | 12 (34.3)    | 8 (22.9)    |                | 10 (45.5)   | 7 (31.8)     | 5 (22.7)    |                | 5 (38.5)     | 5 (38.5)     | 3 (23.1)    |                |
| Female                         | 18 (39.1)    | 13 (28.3)    | 15 (32.6)   |                | 13 (46.4)   | 8 (28.6)     | 7 (25)      |                | 5 (27.8)     | 5 (27.8)     | 8 (44.4)    |                |
| <b>Age (years)</b>             | 0.003        |              |             |                | 0.004       |              |             |                | 0.603        |              |             |                |
| Mean ± SD                      | 47.9 ±14.3   | 61.6 ±14.5   | 58.2 ±14.0  |                | 45.9 ± 14.6 | 63.38±14.12  | 59.91±15.48 |                | 52.4±13.2    | 58.6 ± 15.5  | 56.3±12.7   |                |
| Median (Range)                 | 51 (20-79)   | 65 (31-87)   | 56 (37-79)  |                | 51 (20-79)  | 66 (31-87)   | 61 (37-76)  |                | 50 (27-70)   | 65 (32-77)   | 56 (38-79)  |                |
| <b>Size (mm)</b>               | 0.023        |              |             |                | 0.027       |              |             |                | 0.438        |              |             |                |
| Means ± SD                     | 83.4 ± 53.0  | 126.1 ± 62.6 | 77.2 ± 44.9 |                | 79.7 ± 54.5 | 143.6 ± 68.4 | 75.2 ± 37.8 |                | 93.6 ± 53.1  | 103.6 ± 49.9 | 79.5 ± 54.1 |                |
| Median (Range)                 | 75 (15-200)  | 110 (37-270) | 70 (30-210) |                | 73 (15-200) | 140 (37-270) | 73 (30-130) |                | 120 (15-140) | 98 (37-200)  | 70 (35-210) |                |
| <b>Location</b>                | > 0.001      |              |             |                | 0.010       |              |             |                | 0.007        |              |             |                |
| Abdominal/ Visceral            | 11 (45.8)    | 5 (20.8)     | 8 (33.3)    |                | 4 (36.4)    | 3 (27.3)     | 4 (36.4)    |                | 7 (53.8)     | 2 (15.4)     | 4 (30.8)    |                |
| Pleuro-pulmonary               | 4 (19)       | 15 (71.4)    | 2 (9.5)     |                | 3 (23.1)    | 9 (69.2)     | 1 (7.7)     |                | 1 (12.5)     | 6 (75)       | 1 (12.5)    |                |
| Meningeal                      | 10 (90.9)    | 1 (9.1)      | 0 (0)       |                | 8 (88.9)    | 1 (11.1)     | 0 (0)       |                | 2 (100)      | 0 (0)        | 0 (0)       |                |
| Extremity                      | 3 (30)       | 1 (10)       | 6 (60)      |                | 3 (50)      | 0 (0)        | 3 (50)      |                | 0 (0)        | 1 (25)       | 3 (75)      |                |
| Head and Neck                  | 4 (44.4)     | 1 (11)       | 4 (44.4)    |                | 4 (57.1)    | 1 (14.3)     | 2 (28.6)    |                | 0 (0)        | 0 (0)        | 2 (100)     |                |
| Trunk                          | 1 (16.7)     | 1 (16.7)     | 4 (66.7)    |                | 1 (25)      | 1 (25)       | 2 (50)      |                | 0 (0)        | 0 (0)        | 2 (100)     |                |
| <b>Necrosis</b>                | 0.137        |              |             |                | 0.336       |              |             |                | 0.317        |              |             |                |
| Absent                         | 27 (44.3)    | 16 (26.2)    | 18 (29.5)   |                | 21 (51.2)   | 11 (26.8)    | 9 (22)      |                | 6 (30)       | 5 (25)       | 9 (45)      |                |
| Present                        | 3 (23.1)     | 7 (53.8)     | 3 (23.1)    |                | 2 (25)      | 4 (50)       | 2 (25)      |                | 1 (20)       | 3 (60)       | 1 (20)      |                |
| <b>Mitotic count (10 HPFs)</b> | 0.06         |              |             |                | 0.425       |              |             |                | 0.008        |              |             |                |
| <4 (%)                         | 18 (40)      | 10 (22.2)    | 17 (37.8)   |                | 14 (51.9)   | 6 (22.2)     | 7 (25.9)    |                | 4 (22.2)     | 4 (22.2)     | 10 (55.6)   |                |
| ≥4 (%)                         | 16 (47.1)    | 13 (38.2)    | 5 (14.7)    |                | 9 (39.2)    | 9 (39.1)     | 5 (21.7)    |                | 7 (63.6)     | 4 (36.4)     | 0 (0)       |                |
| <b>Recurrence/progression</b>  | 0.031        |              |             |                | -           |              |             |                | 0.078        |              |             |                |
| No                             | 4 (19)       | 7 (33.3)     | 10 (47.6)   |                |             |              |             |                | 4 (19)       | 7 (33)       | 10 (47.6)   |                |
| Yes                            | 27 (49.1)    | 16 (29.1)    | 12 (21.8)   |                |             |              |             |                | 4 (66.7)     | 1 (16.7)     | 1 (16.7)    |                |
| <b>Outcome</b>                 | 0.191        |              |             |                | 0.295       |              |             |                | 0.291        |              |             |                |
| Alive                          | 23 (39)      | 16 (27.1)    | 20 (33.9)   |                | 16 (48.5)   | 8 (24.2)     | 9 (27.3)    |                | 7 (26.9)     | 8 (30.8)     | 11 (42.3)   |                |
| Dead of disease                | 8 (47.1)     | 7 (41.2)     | 2 (11.8)    |                | 7 (43.8)    | 7 (43.8)     | 2 (12.5)    |                | 1 (100)      | 0 (0)        | 0 (0)       |                |

Data are given as number (%) unless otherwise indicated.  
Significant P values are indicated in bold.
