# Supplementary material for: Evaluation of NAB2-STAT6 Fusion Variants and Other Molecular Alterations as Prognostic Biomarkers in a Case Series of 83 Solitary Fibrous Tumors
Source: MDPI journal article supplement (doi:10.3390/cancers13205237), 2021-10-19
Supplement: s1 [file s1]

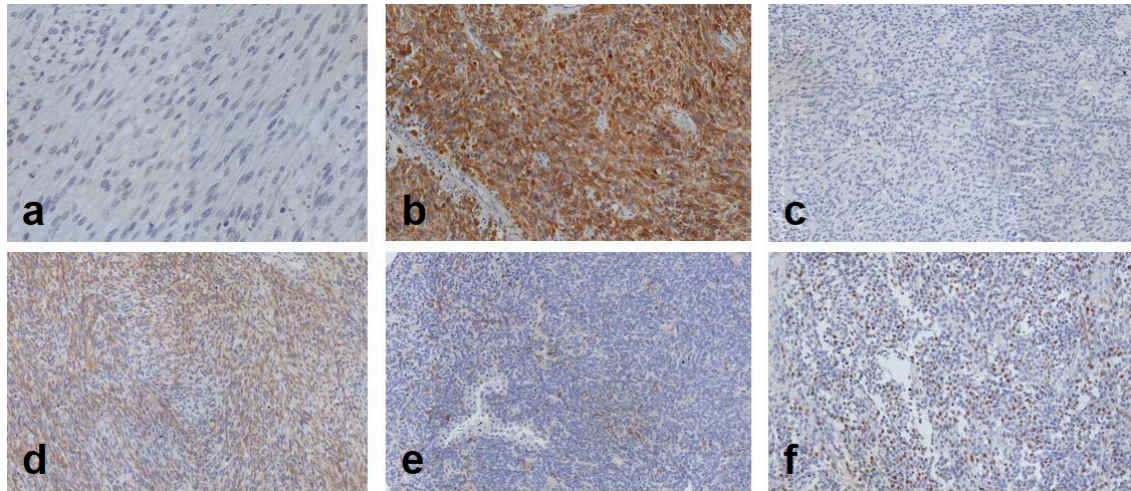

**Figure S3.** Representative immunohistochemical staining for pan-NTRK. **(a)** Negative control: endometrial stromal sarcoma with *ZC3H7B-BCOR* gene rearrangement, Magnitude 40X; **(b)** Positive control: fusocellular mesenchymal neoplasia with *NTRK1-TPM3* gene fusion, Magnitude 20X; **(c)** Negative case: pleuro-pulmonary Solitary Fibrous Tumor (SFT) (#57); **(d)** Cytoplasmic staining: abdominal dedifferentiated SFT (#80), **(e)** Nuclear and cytoplasmic staining: extremity SFT (#51); **(f)** Nuclear staining: meningeal SFT (#50), Magnitude 20X. SFT case numbers correspond to those specified in Table S1.
